# Supplementary material
Source: PubMed Central journal article supplement (PMC4666737)
Supplement: NIHMS712039-supplement-Supporting_Information.pdf [file NIHMS712039-supplement-Supporting_Information.pdf]

## SUPPORTING INFORMATION

# **Aerobic Bioremediation of PAH Contaminated Soil Results in Increased Genotoxicity and Developmental Toxicity**

Leah Chibwe,<sup>1</sup> Mitra C. Geier,<sup>2</sup> Jun Nakamura,<sup>3</sup> Robert L. Tanguay,<sup>2</sup> Michael D. Aitken,<sup>3</sup>

Staci L. Massey Simonich<sup>1,2,\*</sup>

<sup>1</sup> Department of Chemistry, Oregon State University, Corvallis, OR 97331, USA

<sup>2</sup> Department of Environmental & Molecular Toxicology, Oregon State University, Corvallis,  
OR 97331, USA

<sup>3</sup> Department of Environmental Sciences & Engineering, University of North Carolina, Chapel  
Hill, NC 27599, USA

\*Corresponding Author ([staci.simonich@oregonstate.edu](mailto:staci.simonich@oregonstate.edu), fax: 541-737-0497)

**SI contains:**

**10 pages**

**4 tables**

## Contents

|                                                                                                                                                                                                                                                                                                               |           |
|---------------------------------------------------------------------------------------------------------------------------------------------------------------------------------------------------------------------------------------------------------------------------------------------------------------|-----------|
| <b>Materials and methods. Chemicals.....</b>                                                                                                                                                                                                                                                                  | <b>S3</b> |
| <b>Table S1.</b> Mean concentration in dry weight and standard errors (SE) of PAHs in unfractionated soil extracts pre- and post-bioremediation.....                                                                                                                                                          | <b>S4</b> |
| <b>Table S2.</b> Maximum allowable concentrations (MACs) of the 16 priority PAHs in industrial soils regulated in by the U.S. E.P.A. and Canadian Council of Ministers versus observed mean PAH concentrations and standard errors (SE) in unfractionated soil extracts in study.<br>.....                    | <b>S8</b> |
| <b>Table S3.</b> Mean of median lethal concentrations ( $LC_{50}$ ) and standard errors of unfractionated soil extract and soil extract fractions (A – F) pre- and post-bioremediation for <i>DT40</i> , <i>Rad54<sup>-/-</sup></i> , and <i>Rev1<sup>-/-</sup></i> cells in mg soil residue per mL DMSO..... | <b>S6</b> |
| <b>Table S4.</b> Median of effective concentrations ( $EC_{50}$ ) and standard errors of fractionated soil extracts (A-F) pre- and post-bioremediation in embryonic zebrafish.....                                                                                                                            | <b>S7</b> |

## Materials and Methods

**Chemicals.** Isotopically labeled standards used as surrogates for parent, methyl, and heterocyclic PAHs were  $d_{10}$ -fluorene,  $d_{10}$ -phenanthrene,  $d_{10}$ -pyrene,  $d_{12}$ -triphenylene,  $d_{12}$ -benzo[a]pyrene,  $d_{12}$ -benzo[ghi]perylene, for oxygenated PAHs were ( $d_6$ -1,4-naphthoquinone,  $d_8$ -anthraquinone), and for nitrated PAHs were ( $d_9$ -1-nitropyrene,  $d_7$ -1-nitronaphthalene,  $d_{11}$ -6-nitrochrysene,  $d_9$ -5-nitroacenaphthene,  $d_9$ -9-nitroanthracene and  $d_9$ -3-nitrofluoranthene). Isotopically labeled standards used as internal standards for parent, methyl and heterocyclic PAHs were  $d_{10}$ -acenaphthene,  $d_{10}$ -fluoranthene,  $d_{12}$ -benzo[k]fluoranthene, for oxygenated PAHs was  $d_8$ -9-fluorenone and for nitrated PAHs were  $d_9$ -nitrobiphenyl and  $d_9$ -2-nitrofluorene.

**Table S1.** Mean concentration in dry weight and standard errors (SE) of PAHs in unfractionated soil extracts pre- and post-bioremediation. Compounds with asterisks (\*) showed significant changes in concentration post-bioremediation ( $p < 0.05$ ,  $n = 3$ ). No nitrated PAHs were detected above the limit of detection ( $1 \text{ pg } \mu\text{L}^{-1}$ ). (n.d. = not detected).

| PAHs                     | Abbr.     | Pre-bioremediation   | Post-bioremediation  | <i>p</i> value |
|--------------------------|-----------|----------------------|----------------------|----------------|
|                          |           | $\mu\text{g g}^{-1}$ | $\mu\text{g g}^{-1}$ |                |
| Naphthalene              | NAP       | $6.26 \pm 0.49$      | $8.58 \pm 3.82$      | 0.58           |
| 2-Methylnaphthalene      | 2MNAP     | $3.90 \pm 0.67$      | $3.76 \pm 0.67$      | 0.89           |
| 1-Methylnaphthalene      | 1MNAP     | $3.35 \pm 0.62$      | $2.14 \pm 0.41$      | 0.18           |
| 2,6-Dimethylnaphthalene  | 2,6MNAP   | $3.40 \pm 0.52$      | $0.93 \pm 0.22$      | 0.01*          |
| 1,3-Dimethylnaphthalene  | 1,3MNAP   | $3.54 \pm 0.50$      | $1.08 \pm 0.27$      | 0.01*          |
| Acenaphthylene           | ACEY      | $8.03 \pm 0.30$      | $13.78 \pm 2.94$     | 0.12           |
| Acenaphthene             | ACE       | $6.13 \pm 0.71$      | $1.31 \pm 0.43$      | <0.01*         |
| Fluorene                 | FLU       | $4.22 \pm 0.68$      | $3.02 \pm 0.58$      | 0.25           |
| Phenanthrene             | PHE       | $78.32 \pm 11.54$    | $28.65 \pm 7.60$     | 0.02           |
| Anthracene               | ANT       | $11.17 \pm 1.21$     | $10.21 \pm 1.88$     | 0.69           |
| 2-Methylphenanthrene     | 2MPHE     | $57.48 \pm 4.72$     | $16.22 \pm 4.38$     | <0.01*         |
| 2-Methylantracene        | 2MANT     | $6.50 \pm 0.56$      | $3.85 \pm 0.73$      | 0.04*          |
| 1-Methylphenanthrene     | 1MPHE     | $122.95 \pm 8.45$    | $30.32 \pm 7.62$     | <0.01*         |
| 3,6-Dimethylphenanthrene | 3,6MPHE   | $21.57 \pm 1.50$     | $6.48 \pm 1.55$      | <0.01*         |
| Fluoranthene             | FLA       | $63.32 \pm 4.15$     | $19.99 \pm 3.98$     | <0.01*         |
| Pyrene                   | PYR       | $78.84 \pm 3.99$     | $32.03 \pm 6.62$     | <0.01*         |
| Retene                   | RET       | $92.97 \pm 6.15$     | $59.57 \pm 11.20$    | 0.06           |
| Benz[c]fluorine          | BcF       | $9.02 \pm 0.57$      | $4.17 \pm 0.89$      | 0.01*          |
| 1-Methylpyrene           | 1MPYR     | $3.98 \pm 0.38$      | $2.35 \pm 0.54$      | 0.07           |
| Cyclopenta[cd]pyrene     | CdeP      | $1.65 \pm 0.16$      | $2.04 \pm 0.35$      | 0.36           |
| Benzo(a)anthracene       | BaA       | $38.38 \pm 2.76$     | $17.22 \pm 3.30$     | 0.01*          |
| Chrysene + Triphenylene  | CHR+TRI   | $27.17 \pm 1.90$     | $11.99 \pm 2.40$     | 0.01*          |
| 6-Methylchrysene         | 6MCHR     | $2.09 \pm 0.14$      | $1.25 \pm 0.28$      | 0.05           |
| Benzo(b)fluoranthene     | BbF       | $30.42 \pm 2.24$     | $21.76 \pm 3.87$     | 0.12           |
| Benzo(k)fluoranthene     | BkF       | $11.40 \pm 0.95$     | $7.87 \pm 1.53$      | 0.12           |
| Benz[j][e]aceanthrylene  | BjeA      | $0.42 \pm 0.04$      | $0.43 \pm 0.08$      | 0.94           |
| Benzo(e)pyrene           | BeP       | $19.47 \pm 1.98$     | $16.58 \pm 2.99$     | 0.46           |
| Benzo(a)pyrene           | BaP       | $31.00 \pm 2.51$     | $21.15 \pm 3.84$     | 0.10           |
| Dibenz(a,c)anthracene    | DacP/DahP | $0.31 \pm 0.02$      | $0.26 \pm 0.04$      | 0.33           |
| Indeno(1,2,3-cd)pyrene   | IcdP      | $15.43 \pm 0.95$     | $16.77 \pm 2.82$     | 0.67           |
| Benzo(ghi)perylene       | BghiP     | $15.67 \pm 0.80$     | $18.25 \pm 3.08$     | 0.46           |
| Anthranthrene            | ANTH      | $1.88 \pm 0.16$      | $2.15 \pm 0.37$      | 0.53           |
| <b>OPAHs</b>             |           |                      |                      |                |
| 9-Fluorenone             | 9FLO      | $0.13 \pm 0.02$      | $0.07 \pm 0.01$      | 0.05           |
| 1,4-Naphthoquinone       | 1,4NQ     | n.d.                 | $0.00 \pm 0.00$      | n.d.           |
| Acenaphthenequinone      | ACEN      | $0.08 \pm 0.02$      | $0.20 \pm 0.03$      | 0.05           |

|                                   |          |             |             |         |
|-----------------------------------|----------|-------------|-------------|---------|
| Phenanthrene-1,4-dione            | 1,4PD    | 0.16 ± 0.02 | 0.05 ± 0.01 | <0.01*  |
| 9,10-Anthraquinone                | 9,10AQ   | 8.28 ± 0.40 | 2.18 ± 0.30 | <0.001* |
| 1,4-Anthraquinone                 | 1,4AQ    | n.d.        | n.d.        |         |
| 2-methyl-9,10-anthraquinone       | 2M9,10AQ | 3.26 ± 0.57 | 1.16 ± 0.16 | 0.02*   |
| 2-Ethyl-9,10-Anthraquinone        | 2E9,10AQ | 1.69 ± 0.06 | 0.77 ± 0.10 | <0.01*  |
| 9,10-Phenanthrenequinone          | 9,10PQ   | n.d.        | n.d.        |         |
| Benzo[a]fluorenone                | BaF      | 2.05 ± 0.13 | 0.89 ± 0.10 | <0.01*  |
| Benzanthrone                      | BZ       | 1.00 ± 0.12 | 0.74 ± 0.06 | 0.13*   |
| Aceanthrenequinone                | ACEAN    | n.d.        | n.d.        |         |
| Benzo[c]phenanthrene-[1,4]quinone | Bc1,4Q   | 0.73 ± 0.06 | 0.40 ± 0.06 | 0.01*   |
| 7,12-Benzo[a]anthracene dione     | 7,12BaAD | 1.75 ± 0.07 | 1.03 ± 0.08 | <0.01*  |
| Benzo[cd]pyrenone                 | BcdP     | 0.50 ± 0.05 | 0.67 ± 0.07 | 0.11    |
| 5,12-Naphthacenequinone           | 5,12NQ   | n.d.        | n.d.        |         |
| 1,6-Benzo[a]pyrene quinone        | 1,6BaPQ  | n.d.        | n.d.        |         |
| <b>HPAHs</b>                      |          |             |             |         |
| 2-Methylbenzofuran                | 2MBZ     | n.d.        | n.d.        |         |
| Thianapthene                      | THN      | 0.07 ± 0.00 | 0.05 ± 0.01 | 0.09    |
| Quinoline                         | QUI      | 0.03 ± 0.00 | 0.03 ± 0.01 | 0.92    |
| Indole                            | IND      | 0.12 ± 0.02 | 0.03 ± 0.01 | 0.01*   |
| 8-Methylquinoline                 | 8MQ      | n.d.        | n.d.        |         |
| Dibenzofuran                      | DBZ      | 0.53 ± 0.06 | 0.47 ± 0.08 | 0.57    |
| Xanthene                          | XAN      | n.d.        | n.d.        |         |
| 5,6-Benzoquinoline                | 5,6BQ    | 0.86 ± 0.07 | 0.19 ± 0.06 | <0.01*  |
| Acridine                          | ACR      | 0.76 ± 0.06 | 0.15 ± 0.04 | <0.001* |
| Carbazole                         | CAR      | 0.24 ± 0.02 | 0.22 ± 0.03 | 0.70    |
| Dibenzothiophene                  | DBZ      | 0.41 ± 0.04 | 0.24 ± 0.04 | 0.05    |

**Table S2.** Maximum allowable concentrations (MACs) of the 16 priority PAHs in industrial soils regulated in by the U.S. E.P.A. and Canadian Council of Ministers versus observed mean PAH concentrations and standard errors (SE) in unfractionated soil extracts in study.

| Priority PAH | U.S. E.P.A. <sup>1</sup><br>μg g <sup>-1</sup> | Canada <sup>2</sup><br>μg g <sup>-1</sup> | Germany <sup>3</sup><br>μg g <sup>-1</sup> | Pre-bioremediation<br>μg g <sup>-1</sup> | Post-bioremediation<br>μg g <sup>-1</sup> |
|--------------|------------------------------------------------|-------------------------------------------|--------------------------------------------|------------------------------------------|-------------------------------------------|
| NAP          | 17                                             |                                           |                                            | 6.26 ± 0.49                              | 8.58 ± 3.82                               |
| ACE          | 45000                                          |                                           |                                            | 6.13 ± 0.71                              | 1.31 ± 0.43                               |
| ACEY         |                                                |                                           |                                            | 8.03 ± 0.30                              | 13.78 ± 2.94                              |
| FLU          | 30000                                          |                                           |                                            | 4.22 ± 0.68                              | 3.02 ± 0.58                               |
| PHE          |                                                | 50                                        |                                            | 78.32 ± 11.54                            | 28.65 ± 11.54                             |
| ANT          | 230000                                         |                                           |                                            | 11.17 ± 1.21                             | 10.21 ± 1.88                              |
| FLA          | 30000                                          |                                           |                                            | 63.32 ± 4.15                             | 19.99 ± 3.98                              |
| PYR          | 23000                                          | 100                                       |                                            | 78.84 ± 3.99                             | 32.03 ± 6.62                              |
| CHR          | 290                                            |                                           |                                            |                                          |                                           |
| BaA          | 2.9                                            | 10                                        |                                            | 38.38 ± 2.76                             | 17.22 ± 3.30                              |
| BkF          | 29                                             | 10                                        |                                            | 11.40 ± 0.95                             | 7.87 ± 1.53                               |
| BbF          | 2.9                                            | 10                                        |                                            | 30.42 ± 2.24                             | 21.76 ± 3.87                              |
| BaP          | 0.29                                           | 0.7                                       | 12                                         | 31.00 ± 2.51                             | 21.51 ± 3.84                              |
| IcdP         | 2.9                                            | 10                                        |                                            | 15.43 ± 0.95                             | 16.77 ± 2.82                              |
| DahA         | 0.29                                           | 10                                        |                                            |                                          |                                           |
| BghiP        |                                                |                                           |                                            |                                          |                                           |

**Table S3.** Mean lethal concentration (LC<sub>50</sub>) with standard errors bars of unfractionated soil extract and soil extract fractions (A – F) pre- and post-bioremediation for *DT40*, *Rad54*<sup>-/-</sup>, and *Rev1*<sup>-/-</sup> cells in mg soil residue per mL DMSO. The LC<sub>50</sub> values with asterisks (\*) showed a significant decrease post-bioremediation (increased toxicity), while (‡) showed a significant increase post-bioremediation (decreased toxicity) ( $p < 0.05$   $n = 4$ ). The LC<sub>50</sub> for soil extract fraction B post-bioremediation could not be determined because the full dose-response curve could not be captured from the exposure concentrations (N.D. = not determined).

| Cell line                   | Soil/fraction  | Pre-bioremediation<br>mg mL <sup>-1</sup> | Post-bioremediation<br>mg mL <sup>-1</sup> | <i>p</i> value |
|-----------------------------|----------------|-------------------------------------------|--------------------------------------------|----------------|
| <i>DT40</i>                 | Unfractionated | 0.90 ± 0.06                               | 0.48 ± 0.03                                | <0.001*        |
|                             | A              | 1.94 ± 0.28                               | 12.6 ± 0.65                                | <0.0001        |
|                             | B              | 32.2 ± 2.81                               | N.D.                                       | -              |
|                             | C              | 5.48 ± 0.51                               | 116 ± 3.59                                 | <0.0001‡       |
|                             | D              | 3.55 ± 0.44                               | 156 ± 10.5                                 | <0.0001‡       |
|                             | E              | 0.59 ± 0.09                               | 0.35 ± 0.04                                | <0.05*         |
|                             | F              | 5.39 ± 0.78                               | 3.80 ± 0.18                                | 0.09           |
| <i>Rad54</i> <sup>-/-</sup> | Unfractionated | 0.71 ± 0.05                               | 0.31 ± 0.02                                | <0.001*        |
|                             | A              | 1.62 ± 0.23                               | 9.20 ± 1.13                                | <0.001‡        |
|                             | B              | 19.8 ± 1.22                               | N.D.                                       | -              |
|                             | C              | 3.80 ± 0.57                               | 62.7 ± 8.77                                | <0.001‡        |
|                             | D              | 2.64 ± 0.18                               | 73.1 ± 9.45                                | <0.001‡        |
|                             | E              | 0.49 ± 0.03                               | 0.25 ± 0.03                                | <0.01*         |
|                             | F              | 3.93 ± 0.45                               | 3.08 ± 0.21                                | 0.14           |
| <i>Rev1</i> <sup>-/-</sup>  | Unfractionated | 1.12 ± 0.09                               | 0.50 ± 0.06                                | <0.01*         |
|                             | A              | 1.29 ± 0.01                               | 6.75 ± 0.40                                | <0.0001‡       |
|                             | B              | 17.4 ± 1.74                               | N.D.                                       | -              |
|                             | C              | 5.39 ± 0.75                               | 45.8 ± 4.67                                | <0.001‡        |
|                             | D              | 3.39 ± 0.25                               | 36.3 ± 6.84                                | <0.01‡         |
|                             | E              | 0.51 ± 0.05                               | 0.09 ± 0.02                                | <0.001*        |
|                             | F              | 4.60 ± 0.59                               | 1.18 ± 0.26                                | <0.01*         |

**Table S4.** Median effective concentrations (EC<sub>50</sub>) and standard errors of fractionated soil extracts (A-F) pre- and post-bioremediation in embryonic zebrafish. Median EC<sub>50</sub> values with asterisks (\*) showed a significant decrease post-bioremediation (increased developmental toxicity), while (‡) showed a significant increase post-bioremediation (decreased developmental toxicity) ( $p < 0.05$   $n = 32$ ). The median EC<sub>50</sub>s of fractions E and F post-bioremediation were unable to be calculated because the concentrations tested were too low to capture the full dose-response curve (N.D. = not determined).

| Soil fraction | Pre-bioremediation<br>$\mu\text{g mL}^{-1}$ | Post-bioremediation<br>$\mu\text{g mL}^{-1}$ | <i>p</i> value |
|---------------|---------------------------------------------|----------------------------------------------|----------------|
| A             | 0.89 ± 0.04                                 | 0.94 ± 0.03                                  | 0.36           |
| B             | 1.29 ± 0.04                                 | 1.34 ± 0.05                                  | 0.43           |
| C             | 2.11 ± 0.06                                 | 1.01 ± 0.04                                  | <0.001*        |
| D             | 3.30 ± 0.07                                 | 4.74 ± 0.07                                  | <0.001‡        |
| E             | 5.39 ± 0.09                                 | N.D.                                         | -              |
| F             | 8.90 ± 0.12                                 | N.D.                                         | -              |

## REFERENCES

- (1) Regional Screening Levels | Region 9: Superfund | US EPA  
<http://www.epa.gov/region9/superfund/prg/> (accessed Apr 29, 2015).
- (2) Government of Canada, E. C. Guidelines - Acts & Regulations - Environment Canada  
<http://www.ec.gc.ca/lcpe-cepa/default.asp?lang=En&n=E9DBBC31-1> (accessed May 6, 2015).
- (3) Lehmpful, K. Soil protection law <http://www.umweltbundesamt.de/en/topics/soil-agriculture/soil-protection/soil-protection-law> (accessed May 12, 2015).
